# Supplementary material for: α,β-Aziridinylphosphonates by lithium amide-induced phosphonyl migration from nitrogen to carbon in terminal aziridines
Source: publisher site journal article supplement (doi:10.3762/bjoc.6.110), 2010-10-13
Supplement: Additional file 1 [file 1860-5397-6-110-S1.pdf]

# Supporting Information

for

## **$\alpha,\beta$ -Aziridinylphosphonates by lithium amide-induced phosphonyl migration from nitrogen to carbon in terminal aziridines**

David M. Hodgson\* and Zhaoqing Xu

Department of Chemistry, Chemistry Research Laboratory, University of Oxford, Mansfield Road, Oxford, OX1 3TA, UK; Fax +44(1865) 285002

Email: David M. Hodgson\* - david.hodgson@chem.ox.ac.uk

\* Corresponding author

### *Experimental and analytical data*

## Table of contents

| <i>Page</i> |                                                                                                                         |
|-------------|-------------------------------------------------------------------------------------------------------------------------|
| S3          | General remarks                                                                                                         |
| S4          | General procedure A: synthesis of <i>N</i> -phosphonate aziridines <b>1</b>                                             |
| S4          | Diethyl 2-butylaziridin-1-ylphosphonate <b>1a</b>                                                                       |
| S5          | Diethyl 2-cyclohexylaziridin-1-ylphosphonate <b>1b</b>                                                                  |
| S5          | Diethyl 2-(but-3-enyl)aziridin-1-ylphosphonate <b>1c</b>                                                                |
| S6          | Diethyl 2-phenethylaziridin-1-ylphosphonate <b>1d</b>                                                                   |
| S6          | Diethyl 2-[4-( <i>tert</i> -butyldimethylsilyloxy)butyl]aziridin-1-ylphosphonate <b>1e</b>                              |
| S7          | Diethyl 2-(4-chlorobutyl)aziridin-1-ylphosphonate <b>1f</b>                                                             |
| S7          | Diethyl 2,2-dimethylaziridin-1-ylphosphonate <b>1g</b>                                                                  |
| S8          | Diethyl 2-[( <i>tert</i> -butyldimethylsilyloxy)methyl]aziridin-1-ylphosphonate <b>1h</b>                               |
| S9          | Diethyl aziridin-1-ylphosphonate <b>1i</b>                                                                              |
| S9          | Diethyl 7-azabicyclo[4.1.0]heptan-7-ylphosphonate <b>1j</b>                                                             |
| S10         | General procedure B: Synthesis of <i>N</i> -H aziridinylphosphonates <b>3</b>                                           |
| S10         | Diethyl (2 <i>R</i> *,3 <i>R</i> *)-3-butylaziridin-2-ylphosphonate <b>3a</b>                                           |
| S11         | <i>tert</i> -Butyl (2 <i>R</i> *,3 <i>R</i> *)-2-butyl-3-(diethoxyphosphoryl) aziridine-1-carboxylate <b>14</b>         |
| S11         | Diethyl (2 <i>R</i> *,3 <i>R</i> *)-3-(cyclohexyl)aziridin-2-ylphosphonate <b>3b</b>                                    |
| S12         | Diethyl (2 <i>R</i> *,3 <i>R</i> *)-but-3-enylaziridin-2-ylphosphonate <b>3c</b>                                        |
| S12         | Diethyl (2 <i>R</i> *,3 <i>R</i> *)-3-(phenethyl)aziridin-2-ylphosphonate <b>3d</b>                                     |
| S13         | Diethyl (2 <i>R</i> *,3 <i>R</i> *)-3-[4-( <i>tert</i> -butyldimethylsilyloxy)butyl]-aziridin-2-ylphosphonate <b>3e</b> |
| S14         | Diethyl (2 <i>R</i> *,3 <i>R</i> *)-3-(4-chlorobutyl)aziridin-2-ylphosphonate <b>3f</b>                                 |
| S14         | Diethyl 3,3-dimethylaziridin-2-ylphosphonate <b>3g</b>                                                                  |
| S15         | ( <i>R</i> )-1-Aminobutan-2-ol <b>16</b>                                                                                |
| S15         | Diethyl ( <i>S</i> )-2-ethylaziridin-1-ylphosphonate <b>1k</b>                                                          |
| S16         | Diethyl (2 <i>S</i> ,3 <i>S</i> )-3-ethylaziridin-2-ylphosphonate (–)- <b>3k</b>                                        |
| S17         | Diethyl (2 <i>S</i> ,3 <i>S</i> )-1-benzoyl-3-ethylaziridin-2-ylphosphonate (+)- <b>17</b>                              |
| S18         | Diethyl ( <i>S</i> )-(2-aminobutyl)phosphonate (+)- <b>18</b>                                                           |
| S19         | Diethyl ( <i>S</i> )-2-benzamidobutylphosphonate (–)- <b>19</b>                                                         |
| S20         | References                                                                                                              |

## General remarks

All reactions requiring anhydrous conditions were performed in oven-dried or flame-dried glassware under an inert atmosphere (argon or nitrogen). CH<sub>2</sub>Cl<sub>2</sub>, Et<sub>2</sub>O, and THF were degassed and dried over alumina, according to the procedure of Grubbs and co-workers [1]. 2,2,6,6-Tetramethylpiperidine was distilled from CaH<sub>2</sub> under reduced pressure. All other reagents were used as received unless otherwise stated. Reactions were monitored by TLC, using Merck aluminium-backed plates pre-coated with silica (0.25 mm, 60, F<sub>254</sub>). The plates were visualised under UV light and developed using a solution of basic KMnO<sub>4</sub>. Removal of solvent under reduced pressure was performed using Büchi rotary evaporators, achieving a minimum pressure of ca. 15 mbar, followed by drying at 0.1 mbar using an oil pump. Column chromatography was performed on silica [Kieselgel 60 (40–63 µm)]. Petroleum ether refers to the fraction boiling in the range 30–40 °C. Optical rotations were measured using a Perkin-Elmer 241 polarimeter with a cell of path length 10.0 cm; concentrations are quoted in g/100 mL; specific rotations are given in 10<sup>-1</sup> deg cm<sup>2</sup> g<sup>-1</sup>. Infrared spectra were recorded on a Perkin-Elmer 1750 FTIR or a Bruker Tenso 27 FTIR spectrometer; absorptions are quoted in wave numbers (cm<sup>-1</sup>) and are classified as s (strong), m (medium), w (weak) and/or br (broad); only selected absorptions are recorded. <sup>1</sup>H, <sup>13</sup>C and <sup>31</sup>P NMR spectra were recorded on Bruker DPX 200, DPX 250, DPX 400, DQX 400 or AMX 500 spectrometers; chemical shifts (δ) are quoted in parts per million, referenced to the residual solvent peak as an internal standard [2]; coupling constants (*J*) are quoted in Hz. High-resolution mass spectra were obtained by chemical ionisation (NH<sub>3</sub> and Na<sup>+</sup>) or by GC analysis with a BPX5 column-HP 6890 (dimethyl silicone capillary column, *l* = 30 m, *φ* = 0.25 mm) equipped with a reflectron TOF mass spectrometer (60 eV, He flow rate = 1 mL min<sup>-1</sup>). Chiral GC analyses were carried out using a CE Instruments Trace GC (Thermoquest) chromatograph, fitted with an SGE Cydex-B column. Chiral HPLC analyses were carried out using Daicel Chiracel OD, AD or OJ columns (*l* = 250 mm, diameter = 4.6 mm) on a Gilson System with 712 controller software and 188 UV/vis detector, operating at 255 or 224 nm.

### General procedure A: synthesis of *N*-phosphonate aziridines **1** [3]

Alkene (3 mmol) was added to a stirred solution of Br<sub>2</sub>NPO(OEt)<sub>2</sub> [4] (3 mmol) in CH<sub>2</sub>Cl<sub>2</sub> (15 mL) under argon at room temperature. Following stirring for 4 h under UV irradiation (256 nm) at room temperature, the reaction mixture was cooled to 0 °C and NaH (6 mmol) was added slowly. Following stirring at 0 °C for 30 min, the suspension was warmed to room temperature and stirred for a further 1 h. CH<sub>2</sub>Cl<sub>2</sub> (10 mL) and H<sub>2</sub>O (10 mL) were added and the organic phase was washed with H<sub>2</sub>O (2 × 10 mL). The organic phase was dried (MgSO<sub>4</sub>) and evaporated under reduced pressure. Purification of the residue by column chromatography (EtOAc/CHCl<sub>3</sub>) gave the *N*-phosphonate aziridines **1**.

### Diethyl 2-butylaziridin-1-ylphosphonate **1a**

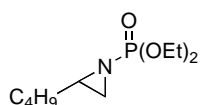

Following **General procedure A** using 1-hexene (0.64 g, 7.6 mmol) gave, following purification of the resulting residue by column chromatography (EtOAc/CHCl<sub>3</sub> 1:2), aziridine **1a** [5] as a pale yellow oil (1.02 g, 57%). *R*<sub>f</sub> 0.54 (EtOAc/CHCl<sub>3</sub> 1:2); *v*<sub>max</sub>/cm<sup>-1</sup> 2933s, 2873m, 1651w, 1467w, 1394w, 1264s (P=O), 1034s and 967s; <sup>1</sup>H NMR (400 MHz, CDCl<sub>3</sub>) δ 4.17–4.10 (4H, m, 2 × OCH<sub>2</sub>), 2.35–2.33 (1H, m, NCH), 2.31 (1H, dd, *J* 18, 6, CH(*H*)N), 1.88 (1H, dd, *J* 10, 4, CH(*H*)N), 1.51–1.36 (6H, m, 3 × CH<sub>2</sub>), 1.33 (6H, t, *J* 7, CH<sub>3</sub>) and 0.90 (3H, t, *J* 7, CH<sub>3</sub>); <sup>13</sup>C NMR (100 MHz, CDCl<sub>3</sub>) δ 63.2 (2 × POCH<sub>2</sub>, t, *J*<sub>C-P</sub> 8), 36.8 (CHN, d, *J*<sub>C-P</sub> 7), 32.2 (CH<sub>2</sub>CH), 30.8 (NCH<sub>2</sub>, d, *J*<sub>C-P</sub> 7), 29.0 (CH<sub>2</sub>), 22.3 (CH<sub>2</sub>CH<sub>3</sub>), 16.3 (2 × OCH<sub>2</sub>CH<sub>3</sub>, t, *J*<sub>C-P</sub> 6) and 13.9 (CH<sub>3</sub>); <sup>31</sup>P NMR (162 MHz, CDCl<sub>3</sub>) δ 16.3; MS CI *m/z* 236 (M + H<sup>+</sup>, 100), 220 (20), 193 (90), 166 (45), 150 (80), 136 (20) and 98 (35); HRMS calcd for C<sub>10</sub>H<sub>23</sub>NO<sub>3</sub><sup>31</sup>P, 236.1416, found 236.1419.

### Diethyl 2-cyclohexylaziridin-1-ylphosphonate **1b**

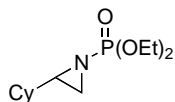

Following **General procedure A** using vinylcyclohexane (330 mg, 3.0 mmol) gave, following purification of the resulting residue by column chromatography (EtOAc/CHCl<sub>3</sub> 1:2), aziridine **1b** as a pale yellow oil (256 mg, 33%). *R*<sub>f</sub> 0.6 (EtOAc/CHCl<sub>3</sub> 1:2);  $\nu_{\max}/\text{cm}^{-1}$  2927s, 1645w, 1450m, 1260s (P=O), 1165m (P–O–C), 1034s and 979s; <sup>1</sup>H NMR (400 MHz, CDCl<sub>3</sub>)  $\delta$  4.18–4.10 (4H, m, 2  $\times$  OCH<sub>2</sub>), 2.28 (2H, m, CHN, CH(*H*)N), 1.92 (1H, dt, *J* 14, 5, 3, CH(*H*)N), 1.84 (1H, d, *J* 11, CH), 1.77–1.65 (4H, m, 2  $\times$  CH<sub>2</sub>), 1.33 (6H, t, *J* 7, 2  $\times$  OCH<sub>3</sub>) and 1.23–1.08 (6H, m, 3  $\times$  CH<sub>2</sub>); <sup>13</sup>C NMR (100 MHz, CDCl<sub>3</sub>)  $\delta$  63.2 (2  $\times$  OCH<sub>2</sub>, t, *J*<sub>C-P</sub> 7), 41.8 (CHN, d, *J*<sub>C-P</sub> 6), 40.5 (CH, d, *J*<sub>C-P</sub> 5), 30.6 (2  $\times$  CH<sub>2</sub>), 29.7 (CH<sub>2</sub>N, t, *J*<sub>C-P</sub> 7), 26.2 (2  $\times$  CH<sub>2</sub>), 25.7(CH<sub>2</sub>) and 16.3 (2  $\times$  CH<sub>3</sub>, d, *J*<sub>C-P</sub> 6); <sup>31</sup>P NMR(162 MHz, CDCl<sub>3</sub>)  $\delta$  15.40; MS CI *m/z* 262 (M+H<sup>+</sup>, 100); HRMS calcd for C<sub>12</sub>H<sub>25</sub>NO<sub>3</sub><sup>31</sup>P, 262.1572, found 262.1581.

### Diethyl 2-(but-3-enyl)aziridin-1-ylphosphonate **1c**

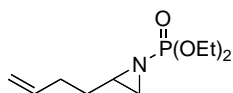

Following **General procedure A** using 1,5-hexadiene (984 mg, 12.0 mmol, 2 equiv) gave, following purification of the resulting residue by column chromatography (EtOAc/CHCl<sub>3</sub> 1:2), aziridine **1c** as a pale yellow oil (505 mg, 36%). *R*<sub>f</sub> 0.50 (EtOAc/CHCl<sub>3</sub> 1:2);  $\nu_{\max}/\text{cm}^{-1}$  2933m, 1641s (C=C), 1369m, 1265s (P=O), 1032m and 800m; <sup>1</sup>H NMR (400 MHz, CDCl<sub>3</sub>)  $\delta$  5.87–5.77 (1H, m, =CH), 5.01 (2H, dd, *J* 17, 10, CH<sub>2</sub>=), 4.17–4.10 (4H, m, 2  $\times$  OCH<sub>2</sub>), 2.54–2.44 (1H, m, NCH), 2.32 (1H, dd, *J* 12, 6, CH(*H*)N), 2.23–2.16 (2H, m, =CHCH<sub>2</sub>), 1.90 (1H, dd, *J* 11, 4, CH(*H*)N), 1.60–1.54 (2H, m, CH<sub>2</sub>) and 1.33 (6H, t, *J* 7, 2  $\times$  CH<sub>3</sub>); <sup>13</sup>C NMR (100 MHz, CDCl<sub>3</sub>)  $\delta$  137.5 (=CH), 115.2 (CH<sub>2</sub>=), 63.3 (POCH<sub>2</sub>, d, *J*<sub>C-P</sub> 2), 63.2 (POCH<sub>2</sub>, d, *J*<sub>C-P</sub> 2), 36.3 (CHN, d, *J*<sub>C-P</sub> 7), 31.8 (=CHCH<sub>2</sub>, d, *J*<sub>C-P</sub> 6), 30.9 (NCH<sub>2</sub>, t, *J*<sub>C-P</sub> 8 and CH<sub>2</sub>) and 16.3 (2  $\times$  CH<sub>2</sub>CH<sub>3</sub>, d, *J*<sub>C-P</sub> 7); <sup>31</sup>P

NMR (162 MHz, CDCl<sub>3</sub>)  $\delta$  15.2; MS CI  $m/z$  234 (M+H<sup>+</sup>, 95), 154 (30), 126 (15), 98 (100) and 94 (30); HRMS calcd for C<sub>10</sub>H<sub>21</sub>NO<sub>3</sub><sup>31</sup>P, 234.1259, found 234.1251.

### Diethyl 2-phenethylaziridin-1-ylphosphonate **1d**

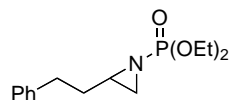

Following **General procedure A** using 4-phenyl-1-butene (933 mg, 3.0 mmol) gave, following purification of the resulting residue by column chromatography (EtOAc/CHCl<sub>3</sub> 1:2), aziridine **1d** as a pale yellow oil (600 mg, 71%).  $R_f$  0.54 (EtOAc/CHCl<sub>3</sub> 1:2);  $\nu_{\max}/\text{cm}^{-1}$  2985m, 1455m, 1394m, 1264s (P=O), 1163m (P-O-C), 1031s, 968s and 700m; <sup>1</sup>H NMR (400 MHz, CDCl<sub>3</sub>)  $\delta$  7.31–7.20 (5H, m, 5  $\times$  C<sub>Ar</sub>H), 4.20–4.12 (4H, m, 2  $\times$  OCH<sub>2</sub>), 2.85–2.70 (2H, m, PhCH<sub>2</sub>), 2.57–2.48 (1H, m, NCH), 2.33 (1H, dd,  $J$  18, 6, CH(H)N), 1.89 (1H, dd,  $J$  14, 3, CH(H)N), 1.83–1.79 (2H, m, CH<sub>2</sub>CH) and 1.35 (6H, t,  $J$  7, 2  $\times$  CH<sub>3</sub>); <sup>13</sup>C NMR (100 MHz, CDCl<sub>3</sub>)  $\delta$  141.2 (C<sub>Ar</sub> quat), 128.4 (2  $\times$  C<sub>Ar</sub>), 128.3 (2  $\times$  C<sub>Ar</sub>), 126.0 (C<sub>Ar</sub>), 63.3 (2  $\times$  OCH<sub>2</sub>, d,  $J_{C-P}$  8), 36.4 (CHN, d,  $J_{C-P}$  7), 34.4 (CH<sub>2</sub>CHN), 33.2 (C<sub>Ar</sub>CH<sub>2</sub>), 30.9 (NCH<sub>2</sub>, d,  $J_{C-P}$  7) and 16.3 (2  $\times$  CH<sub>3</sub>, d,  $J_{C-P}$  6); <sup>31</sup>P NMR (162 MHz, CDCl<sub>3</sub>)  $\delta$  14.69; MS CI  $m/z$  284 (M + H<sup>+</sup>, 100), 166 (5), 154 (20) and 148 (40); HRMS calcd for C<sub>14</sub>H<sub>23</sub>NO<sub>3</sub><sup>31</sup>P, 284.1416, found 284.1408.

### Diethyl 2-[4-(*tert*-butyldimethylsilyloxy)butyl]aziridin-1-ylphosphonate **1e**

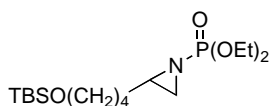

Following **General procedure A** using *tert*-butyl(hex-5-enyloxy)dimethylsilane [6] (642 mg, 3.0 mmol) gave, following purification of the resulting residue by column chromatography (EtOAc/CHCl<sub>3</sub> 1:2), aziridine **1e** as a pale yellow oil (193 mg, 18%).  $R_f$  0.63 (EtOAc/CHCl<sub>3</sub> 1:2);  $\nu_{\max}/\text{cm}^{-1}$  2931m, 2859s, 1472m, 1255s (P=O), 1103m (P-O-C) and 910s; <sup>1</sup>H NMR (400 MHz, CDCl<sub>3</sub>)  $\delta$  4.18–4.11 (4H, m, 2  $\times$  OCH<sub>2</sub>), 3.61 (2H, t,  $J$  6, OCH<sub>2</sub>), 2.51–2.44 (1H, m, NCH), 2.32

(1H, dd,  $J$  12, 6, CH( $H$ )N), 1.89 (1H, dd,  $J$  10, 4, CH( $H$ )N), 1.59–1.46 (6H, m,  $3 \times \text{CH}_2$ ), 1.33 (6H, t,  $J$  7,  $\text{CH}_3$ ), 0.89 (9H, s,  $\text{C}(\text{CH}_3)_3$ ) and 0.05 (6H, s,  $\text{Si}(\text{CH}_3)_3$ );  $^{13}\text{C}$  NMR (100 MHz,  $\text{CDCl}_3$ )  $\delta$  63.2 ( $2 \times \text{POCH}_2$ , t,  $J_{\text{C-P}}$  5), 62.9 ( $\text{OCH}_2$ ), 36.8 ( $\text{CHN}$ , d,  $J_{\text{C-P}}$  6), 32.4 ( $2 \times \text{CH}_2$ , t,  $J_{\text{C-P}}$  5), 30.9 ( $\text{NCH}_2$ , d,  $J_{\text{C-P}}$  7), 25.9 ( $\text{C}(\text{CH}_3)_3$ ), 23.3 ( $\text{CH}_2$ ), 18.3 ( $\text{SiC}$ ), 16.3 ( $\text{CH}_2\text{CH}_3$ , d,  $J_{\text{C-P}}$  6) and -5.3 ( $\text{Si}(\text{CH}_3)_2$ );  $^{31}\text{P}$  NMR (162 MHz,  $\text{CDCl}_3$ )  $\delta$  15.2; MS CI  $m/z$  366 ( $\text{M} + \text{H}^+$ , 100), 351 (95), 234 (90), 228 (100) and 139 (40); HRMS calcd for  $\text{C}_{16}\text{H}_{37}\text{NO}_4\text{Si}^{31}\text{P}$ , 366.2230, found 366.2226.

### Diethyl 2-(4-chlorobutyl)aziridin-1-ylphosphonate **1f**

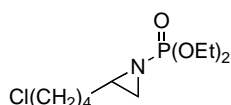

Following **General procedure A** using 6-chloro-1-hexene (356 mg, 3.0 mmol) gave, following purification of the resulting residue by column chromatography ( $\text{EtOAc}/\text{CHCl}_3$  1:2), aziridine **1f** as a pale yellow oil (555 mg, 69%).  $R_f$  0.48 ( $\text{EtOAc}/\text{CHCl}_3$  1:2);  $\nu_{\text{max}}/\text{cm}^{-1}$  2986s, 1445m, 1394m, 1262s ( $\text{P}=\text{O}$ ), 1164m, 1032s and 973s;  $^1\text{H}$  NMR (400 MHz,  $\text{CDCl}_3$ )  $\delta$  4.18–4.11 (4H, m,  $2 \times \text{OCH}_2$ ), 3.55 (2H, t,  $J$  7,  $\text{ClCH}_2$ ), 2.49–2.44 (1H, m,  $\text{NCH}$ ), 2.33 (dd,  $J$  10, 6, 1H  $\text{CH}(\text{H})\text{N}$ ), 1.90 (1H, dd,  $J$  10, 4,  $\text{CH}(\text{H})\text{N}$ ), 1.86–1.80 (2H, m,  $\text{ClCH}_2\text{CH}_2$ ), 1.63–1.40 (4H, m,  $2 \times \text{CH}_2$ ) and 1.34 (6H, t,  $J$  7,  $2 \times \text{CH}_3$ );  $^{13}\text{C}$  NMR (100 MHz,  $\text{CDCl}_3$ )  $\delta$  63.3 ( $2 \times \text{OCH}_2$  d,  $J_{\text{C-P}}$  8), 44.8 ( $\text{ClCH}_2$ ), 36.5 ( $\text{CHN}$ , d,  $J_{\text{C-P}}$  7), 32.0 ( $\text{CH}_2\text{CH}$ ), 31.7 ( $\text{ClCH}_2\text{CH}_2$ , d,  $J_{\text{C-P}}$  5), 30.8 ( $\text{NCH}_2$ , d,  $J_{\text{C-P}}$  7), 24.3 ( $\text{CH}_2$ ) and 16.3 ( $2 \times \text{CH}_3$  t,  $J_{\text{C-P}}$  6);  $^{31}\text{P}$  NMR (162 MHz,  $\text{CDCl}_3$ )  $\delta$  16.1; MS CI  $m/z$  272 ( $^{37}\text{ClM} + \text{H}^+$ , 15), 270 ( $^{35}\text{ClM} + \text{H}^+$ , 100) and 234 (30); HRMS calcd for  $\text{C}_{10}\text{H}_{22}\text{NO}_3^{31}\text{P}^{35}\text{Cl}$  270.1026, found 270.1020.

### Diethyl 2,2-dimethylaziridin-1-ylphosphonate **1g**

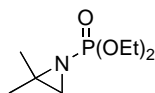

A solution of  $\text{Br}_2\text{NPO}(\text{OEt})_2$  [4] (1.87 g, 6.0 mmol) in  $\text{CH}_2\text{Cl}_2$  (5 mL) was added dropwise to a saturated solution of isobutylene in  $\text{CH}_2\text{Cl}_2$  (10mL) at room temperature at such a rate as to

maintain a slightly yellow colouration of the reaction mixture (~30 min). A slow stream of isobutylene was passed continuously through the solution and the resultant adduct was treated with NaOMe (15% solution in MeOH, 4.30 mL 12.0 mmol) at room temperature. Following stirring for 1 h, H<sub>2</sub>O (10 mL) was added, the organic phase was washed with H<sub>2</sub>O (2 × 10 mL), dried (MgSO<sub>4</sub>) and evaporated under reduced pressure. Purification of the residue by column chromatography (EtOAc/CHCl<sub>3</sub> 1:2) gave aziridine **1g** [3,8] as a colourless oil (807 mg, 65%). *R<sub>f</sub>* 0.55 (EtOAc/CHCl<sub>3</sub> 1:2);  $\nu_{\max}/\text{cm}^{-1}$  2934m, 2360m, 1254s (P=O), 1149m (P–O–C) and 970s; <sup>1</sup>H NMR (400 MHz, CDCl<sub>3</sub>)  $\delta$  4.15–4.08 (4H, m, 2 × OCH<sub>2</sub>), 2.18 (1H, s, C(H)HN), 2.15 (1H, s, C(H)HN), 1.39 (6H, s, 2 × CH<sub>3</sub>) and 1.32 (6H, t, *J* 7, 2 × CH<sub>3</sub>); <sup>13</sup>C NMR (100 MHz, CDCl<sub>3</sub>)  $\delta$  62.9 (2 × OCH<sub>2</sub>, d, *J<sub>C-P</sub>* 7), 40.8 (CN, d, *J<sub>C-P</sub>* 7), 38.6 (CH<sub>2</sub>N, d, *J<sub>C-P</sub>* 7), 23.1 (2 × CH<sub>3</sub>, d, *J<sub>C-P</sub>* 5) and 16.3 (2 × OCH<sub>2</sub>CH<sub>3</sub>, m, *J<sub>C-P</sub>* 7); <sup>31</sup>P NMR (162 MHz, CDCl<sub>3</sub>)  $\delta$  12.4; MS CI *m/z* 208 (M + H<sup>+</sup>, 100), 131 (10) and 72 (15); HRMS calcd for C<sub>8</sub>H<sub>19</sub>NO<sub>3</sub><sup>31</sup>P, 208.1103, found 208.1102.

### Diethyl 2-[(*tert*-butyldimethylsilyloxy)methyl]aziridin-1-ylphosphonate **1h**

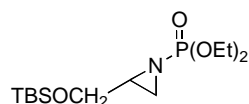

Following **General procedure A** using allyloxy(*tert*-butyl)dimethylsilane (516 mg, 3.0 mmol, Aldrich) gave, following purification of the resulting residue by column chromatography (EtOAc/CHCl<sub>3</sub> 1:2), aziridine **1h** as a pale yellow oil (436 mg, 45%). *R<sub>f</sub>* 0.60 (EtOAc/CHCl<sub>3</sub> 1:2);  $\nu_{\max}/\text{cm}^{-1}$  2935m, 1470m, 1250s (P=O), 1100m (P–O–C) and 937s; <sup>1</sup>H NMR (400 MHz, CDCl<sub>3</sub>)  $\delta$  4.20–4.12 (4H, m, 2 × OCH<sub>2</sub>), 3.66–3.64 (2H, m, OCH<sub>2</sub>), 2.72–2.64 (1H, m, NCH), 2.34 (1H, dd, *J* 11, 6, CH(H)N), 1.99 (1H, dd, *J* 11, 3, CH(H)N), 1.59–1.46 (6H, m, 3 × CH<sub>2</sub>), 1.33 (6H, t, *J* 7, CH<sub>3</sub>), 0.89 (9H, s, C(CH<sub>3</sub>)<sub>3</sub>) and 0.06 (6H, s, Si(CH<sub>3</sub>)<sub>3</sub>); <sup>13</sup>C NMR (100 MHz, CDCl<sub>3</sub>)  $\delta$  64.5 (OCH<sub>2</sub>, d, *J<sub>C-P</sub>* 5), 63.4 (2 × POCH<sub>2</sub>, t, *J<sub>C-P</sub>* 7), 37.3 (CHN, d, *J<sub>C-P</sub>* 6), 28.4 (NCH<sub>2</sub>, d, *J<sub>C-P</sub>* 7), 25.9 (C(CH<sub>3</sub>)<sub>3</sub>), 18.4 (SiC), 16.3 (CH<sub>2</sub>CH<sub>3</sub>, d, *J<sub>C-P</sub>* 6) and -5.3 (Si(CH<sub>3</sub>)<sub>2</sub>); <sup>31</sup>P NMR (162 MHz, CDCl<sub>3</sub>)  $\delta$



14.5; MS CI  $m/z$  324 ( $M + H^+$ , 100), 309 (70) and 97 (25); HRMS calcd for  $C_{13}H_{31}NO_4Si^{31}P$ , 324.1760, found 324.1762.

### Diethyl aziridin-1-ylphosphonate **1i**

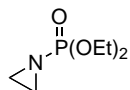

Following the lit. procedure [7], from diethyl chlorophosphate (1.73 g, 10 mmol), 2-chloroethylamine hydrochloride (1.16 g, 10 mmol) and  $Et_3N$  (2.8 mL, 20 mmol) in  $CH_2Cl_2$  (50 mL) was obtained a residue which was purified by column chromatography (EtOAc/ $CHCl_3$  1:2) to give aziridine **1i** [7] as a colourless oil (1.15 g, 64%).  $R_f$  0.60 (EtOAc/ $CHCl_3$  1:2);  $\nu_{max}/cm^{-1}$  2930s, 1645w, 1460w, 1264s (P=O), 1037s and 967s;  $^1H$  NMR (400 MHz,  $CDCl_3$ )  $\delta$  4.16–4.09 (4H, m,  $2 \times OCH_2$ ), 2.12 (4H, d,  $J$  16,  $2 \times NCH_2$ ) and 1.31 (6H, t,  $J$  7,  $CH_3$ );  $^{13}C$  NMR (100 MHz,  $CDCl_3$ )  $\delta$  63.4 ( $2 \times POCH_2$ , d,  $J_{C-P}$  6), 24.3 ( $CH_2$ , d,  $J_{C-P}$  7) and 16.3 ( $2 \times OCH_2CH_3$ , t,  $J_{C-P}$  6);  $^{31}P$  NMR (162 MHz,  $CDCl_3$ )  $\delta$  15.4; MS CI  $m/z$  180 ( $M + H^+$ , 100); HRMS calcd for  $C_6H_{15}NO_3^{31}P$ , 180.0790, found 180.0799.

### Diethyl 7-azabicyclo[4.1.0]heptan-7-ylphosphonate **1j**

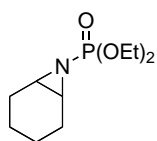

Following **General procedure A** using cyclohexene (246 mg, 3.0 mmol) gave, following purification of the resulting residue by column chromatography (EtOAc/ $CHCl_3$  1:2), aziridine **1j** [5] as a pale yellow oil (133 mg, 19%).  $R_f$  0.55 (EtOAc/ $CHCl_3$  1:2);  $\nu_{max}/cm^{-1}$  2936s, 1444m, 1385m, 1232s (P=O), 1020s, 963s and 789;  $^1H$  NMR (400 MHz,  $CDCl_3$ )  $\delta$  4.19–4.11 (4H, m,  $2 \times OCH_2$ ), 2.61 (1H, t,  $J$  4, NCH), 2.49 (1H, t,  $J$  4, NCH), 1.98–1.77 (4H, m,  $2 \times CH_2$ ), 1.66–1.60 (2H, m,  $CH_2$ ), 1.55–1.43 (2H, m,  $CH_2$ ) and 1.32 (6H, t,  $J$  7,  $2 \times CH_3$ );  $^{13}C$  NMR (100 MHz,  $CDCl_3$ )  $\delta$  63.3 ( $2 \times OCH_2$  d,  $J_{C-P}$  6), 34.5 (CHN, d,  $J_{C-P}$  7), 24.2 ( $2 \times CH_2$ ), 20.0 ( $2 \times CH_2$ ) and 16.3 ( $2 \times CH_3$  t,  $J_C$ .

*p* 6);  $^{31}\text{P}$  NMR (162 MHz,  $\text{CDCl}_3$ )  $\delta$  15.3; MS CI  $m/z$  234 ( $\text{M} + \text{H}^+$ , 100); HRMS calcd for  $\text{C}_{10}\text{H}_{21}\text{NO}_3^{31}\text{P}$  234.1259, found 234.1258.

### General procedure B: synthesis of N-H aziridinylphosphonates 3

*n*-BuLi (1.6 M in hexanes, 2.30 mL, 3.7 mmol) was added dropwise to a stirred solution of TMP (0.63 mL, 3.7 mmol) in THF (15 mL) at  $-78\text{ }^\circ\text{C}$  under argon. Following warming to room temperature for 30 min, the resulting solution was re-cooled to  $-78\text{ }^\circ\text{C}$  and a solution of aziridine **1** (0.74 mmol) in THF (1 mL) was added dropwise over 1 min. Following stirring for 1–4 h at  $-78\text{ }^\circ\text{C}$ , saturated aqueous  $\text{NH}_4\text{Cl}$  (2 mL) was added and the flask was warmed to room temperature. The aqueous phase was washed with  $\text{Et}_2\text{O}$  ( $3 \times 10\text{ mL}$ ), the combined organic phase was dried ( $\text{MgSO}_4$ ) and then evaporated under reduced pressure. Purification of the residue by column chromatography ( $\text{EtOAc}/\text{CHCl}_3/\text{MeOH}$  1:1:0.05,  $\text{SiO}_2$ ) gave the aziridinylphosphonate **3**.

### Diethyl (2*R*\*,3*R*\*)-3-butylaziridin-2-ylphosphonate 3a

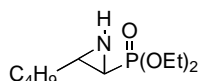

Following **General procedure B** using aziridine **1a** (175 mg, 0.74 mmol) for 4 h gave, following purification of the resulting residue by column chromatography ( $\text{EtOAc}/\text{CHCl}_3/\text{MeOH}$  1:1:0.05), aziridinylphosphonate **3a** as a pale yellow oil (159 mg, 91%).  $R_f$  0.40 ( $\text{EtOAc}/\text{CHCl}_3/\text{MeOH}$  1:1:0.05);  $\nu_{\text{max}}/\text{cm}^{-1}$  3250br.m (N–H), 2932s, 1653w, 1458m, 1393w, 1233s (P=O), 1127s (P–O–C) and 968s;  $^1\text{H}$  NMR (400 MHz,  $\text{CDCl}_3$ )  $\delta$  4.16–4.07 (4H, m,  $2 \times \text{OCH}_2$ ), 2.33–2.31 (1H, m, CHN), 1.59 (1H, dd,  $^2J_{\text{H-P}}$  18,  $^3J_{\text{H-H}}$  3, CHP), 1.51–1.32 (13H, m,  $3 \times \text{CH}_2$ , NH,  $2 \times \text{OCH}_2\text{CH}_3$ ) and 0.89 (3H, t,  $J$  7,  $\text{CH}_3$ );  $^{13}\text{C}$  NMR (100 MHz,  $\text{CDCl}_3$ )  $\delta$  62.3 ( $2 \times \text{OCH}_2$ , t,  $J_{\text{C-P}}$  7), 34.9 (CHN), 32.8 ( $\text{CH}_2\text{CH}$ ), 29.5 (PCHN, d,  $J_{\text{C-P}}$  139), 29.3 ( $\text{CH}_2$ ), 22.3 ( $\text{CH}_2$ ), 16.4 ( $2 \times \text{CH}_3$ , d,  $J_{\text{C-P}}$  3) and 13.9 ( $\text{CH}_3$ );  $^{31}\text{P}$  NMR (162 MHz,  $\text{CDCl}_3$ )  $\delta$  27.33; MS CI  $m/z$  236 ( $\text{M} + \text{H}^+$ , 100), 206 (83), 98 (99) and 84 (24); HRMS calcd for  $\text{C}_{10}\text{H}_{23}\text{NO}_3^{31}\text{P}$ , 236.1416, found 236.1408.

***tert*-Butyl (2*R*\*,3*R*\*)-2-butyl-3-(diethoxyphosphoryl) aziridine-1-carboxylate **14****

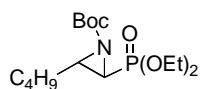

Di-*tert*-butyl dicarbonate (186 mg, 0.85 mmol) was added to a stirred solution of aziridinyolphosphonate **3a** (50 mg, 0.21 mmol) and DMAP (29 mg, 0.23 mmol) in CH<sub>2</sub>Cl<sub>2</sub> (5 mL) at 0 °C under argon. Following stirring for 2 h, the solution was warmed to room temperature and stirred for 48 h. Saturated aqueous NH<sub>4</sub>Cl (2 mL) was added and the organic phase was washed with H<sub>2</sub>O (2 mL), dried (Na<sub>2</sub>SO<sub>4</sub>) and evaporated under reduced pressure. Purification by column chromatography (EtOAc/CHCl<sub>3</sub> 1:2) gave *N*-Boc aziridine **14** as a pale yellow oil (61 mg, 85%). *R*<sub>f</sub> 0.64 (EtOAc/CHCl<sub>3</sub> 1:2);  $\nu_{\max}/\text{cm}^{-1}$  2980s, 1725s (C=O), 1394m, 1321s, 1257s, 1160s (P=O), 1027s and 970s; <sup>1</sup>H NMR (400 MHz, CDCl<sub>3</sub>)  $\delta$  4.24–4.13 (4H, m, 2 × OCH<sub>2</sub>), 2.77–2.71 (1H, m, NCH), 2.30 (1H, dd, <sup>2</sup>*J*<sub>H-P</sub> 18.5, <sup>3</sup>*J*<sub>H-H</sub> 3.5, CHP), 1.58–1.25 (21H, m, C(CH<sub>3</sub>)<sub>3</sub>, 3 × CH<sub>2</sub>, 2 × OCH<sub>2</sub>CH<sub>3</sub>) and 0.92 (3H, t, *J* 7, CH<sub>3</sub>); <sup>13</sup>C NMR (100 MHz, CDCl<sub>3</sub>)  $\delta$  159.4 (C=O), 81.9 (OC), 62.9 (POCH<sub>2</sub>, d, *J*<sub>C-P</sub> 6), 62.4 (POCH<sub>2</sub>, d, *J*<sub>C-P</sub> 6), 41.5 (CN, d, *J*<sub>C-P</sub> 3), 35.3 (CHP, d, *J*<sub>C-P</sub> 197), 30.7 (CH<sub>2</sub>CH), 28.9 (CH<sub>2</sub>), 27.9 (C(CH<sub>3</sub>)<sub>3</sub>), 22.2 (CH<sub>3</sub>CH<sub>2</sub>), 16.4 (2 × OCH<sub>2</sub>CH<sub>3</sub>, t, *J*<sub>C-P</sub> 5) and 13.9 (CH<sub>3</sub>); <sup>31</sup>P NMR (162 MHz, CDCl<sub>3</sub>)  $\delta$  21.22; MS CI *m/z* 336 (M + H<sup>+</sup>, 100); HRMS calcd for C<sub>15</sub>H<sub>30</sub>NNaO<sub>5</sub><sup>31</sup>P 358.1754, found 358.1756.

**Diethyl (2*R*\*,3*R*\*)-3-(cyclohexyl)aziridin-2-ylphosphonate **3b****

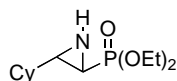

Following **General procedure B** using aziridine **1b** (100 mg, 0.38 mmol, all other reagents were scaled accordingly) for 2 h gave, following purification of the resulting residue by column chromatography (EtOAc/CHCl<sub>3</sub>/MeOH 1:1:0.05), aziridinyolphosphonate **3b** as a pale yellow oil (79 mg, 79%). *R*<sub>f</sub> 0.46 (EtOAc/CHCl<sub>3</sub>/MeOH 1:1:0.05);  $\nu_{\max}/\text{cm}^{-1}$  3250br.m (N–H), 2927s, 1449m, 1234s (P=O), 1028s and 968s; <sup>1</sup>H NMR (400 MHz, CDCl<sub>3</sub>)  $\delta$  4.17–4.09 (4H, m, 2 × OCH<sub>2</sub>), 2.16

(1H, m, CHN), 1.88 (1H, d, *J* 12, CHP), 1.75–1.65 (6H, m, 3 × CH<sub>2</sub>), 1.35 (6H, t, *J* 7, 2 × CH<sub>3</sub>), 1.28–1.07 (5H, m, 2 × CH<sub>2</sub>, NH) and 0.98–0.93 (1H, m, CHCH<sub>2</sub>); <sup>13</sup>C NMR (100 MHz, CDCl<sub>3</sub>) δ 62.5 (OCH<sub>2</sub>, d, *J*<sub>C-P</sub> 6), 62.3 (OCH<sub>2</sub>, d, *J*<sub>C-P</sub> 6), 41.2 (CHN), 39.9 (CH), 30.9 (CH<sub>2</sub>), 30.2 (CH<sub>2</sub>), 27.3 (CP, d, *J*<sub>C-P</sub> 201), 26.2 (CH<sub>2</sub>), 25.8 (CH<sub>2</sub>), 25.6 (CH<sub>2</sub>) and 16.5 (2 × CH<sub>3</sub>, t, *J*<sub>C-P</sub> 8); <sup>31</sup>P NMR (162 MHz, CDCl<sub>3</sub>) δ 26.87; MS CI *m/z* (rel. int.) 262 (M + H<sup>+</sup>, 100), 247 (20) and 124 (20); HRMS calcd for C<sub>12</sub>H<sub>25</sub>NO<sub>3</sub><sup>31</sup>P, 262.1572, found 262.1561.

### Diethyl (2*R*\*,3*R*\*)-but-3-enylaziridin-2-ylphosphonate **3c**

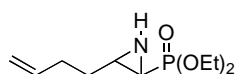

Following **General procedure B** using aziridine **1c** (100 mg, 0.43 mmol, all other reagents were scaled accordingly) for 2 h gave, following purification of the resulting residue by column chromatography (EtOAc/CHCl<sub>3</sub>/MeOH 1:1:0.05), aziridinylphosphonate **3c** as a pale yellow oil (79 mg, 79%). *R*<sub>f</sub> 0.45 (EtOAc/CHCl<sub>3</sub>/MeOH 1:1:0.05); *v*<sub>max</sub>/cm<sup>-1</sup> 3212br.m (N–H), 2931m, 1641s (C=C), 1444m, 1237s (P=O), 1031m and 969s; <sup>1</sup>H NMR (400 MHz, CDCl<sub>3</sub>) δ 5.87–5.79 (1H, m, =CH), 5.01 (2H, dd, *J* 17, 10, CH<sub>2</sub>=), 4.16–4.08 (4H, m, 2 × OCH<sub>2</sub>), 2.35 (1H, m, NCH), 2.23–2.17 (2H, m, =CHCH<sub>2</sub>), 1.65–1.48 (4H, m, NH, CHP, CH<sub>2</sub>) and 1.33 (6H, t, *J* 7, 2 × CH<sub>3</sub>); <sup>13</sup>C NMR (100 MHz, CDCl<sub>3</sub>) δ 137.4 (=CH), 115.3 (CH<sub>2</sub>=), 62.4 (2 × OCH<sub>2</sub>, t, *J*<sub>C-P</sub> 6), 34.4 (CH<sub>2</sub>CHN), 32.5 (CH<sub>2</sub>CHN), 31.3 (=CHCH<sub>2</sub>), 28.7 (CP, d, *J*<sub>C-P</sub> 188), 16.5 (CH<sub>2</sub>CH<sub>3</sub>, d, *J*<sub>C-P</sub> 5) and 16.4 (CH<sub>2</sub>CH<sub>3</sub>, d, *J*<sub>C-P</sub> 6); <sup>31</sup>P NMR (162 MHz, CDCl<sub>3</sub>) δ 26.3; MS CI *m/z* 234 (M + H<sup>+</sup>, 100), 219 (35) and 96 (90); HRMS calcd for C<sub>10</sub>H<sub>21</sub>NO<sub>3</sub><sup>31</sup>P, 234.1259, found 234.1251.

### Diethyl (2*R*\*,3*R*\*)-3-(phenethyl)aziridin-2-ylphosphonate **3d**

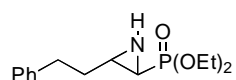

Following **General procedure B** using aziridine **1d** (100 mg, 0.35 mmol, all other reagents were scaled accordingly) for 2 h gave, following purification of the resulting residue by column

chromatography (EtOAc/CHCl<sub>3</sub>/MeOH 1:1:0.05), aziridinyolphosphonate **3d** as a pale yellow oil (87 mg, 87%). *R*<sub>f</sub> 0.42 (EtOAc/CHCl<sub>3</sub>/MeOH 1:1:0.05);  $\nu_{\max}/\text{cm}^{-1}$  3248br.m (N–H), 2985s, 1604w, 1455m, 1234s (P=O), 1026s, 969s and 700m; <sup>1</sup>H NMR (400 MHz, CDCl<sub>3</sub>)  $\delta$  7.29 (3H, m, 3 × C<sub>Ar</sub>H), 7.21 (2H, m, 2 × C<sub>Ar</sub>H), 4.17–4.08 (4H, m, 2 × OCH<sub>2</sub>), 2.85–2.72 (2H, m, PhCH<sub>2</sub>), 2.39 (1H, m, NCH), 1.82–1.73 (3H, m, CHP, CH<sub>2</sub>), 1.35 (6H, t, *J* 7, 2 × CH<sub>3</sub>) and 1.08 (1H, br.s, NH); <sup>13</sup>C NMR (100 MHz, CDCl<sub>3</sub>)  $\delta$  141.1 (C<sub>Ar</sub> quat), 128.5 (2 × C<sub>Ar</sub>), 128.4 (2 × C<sub>Ar</sub>), 126.0 (C<sub>Ar</sub>), 62.4 (2 × OCH<sub>2</sub>, d, *J*<sub>C-P</sub> 6), 34.4 (CHN), 33.7 (CH<sub>2</sub>CHN), 33.4 (C<sub>Ar</sub>CH<sub>2</sub>), 28.5 (CHP, d, *J*<sub>C-P</sub> 136) and 16.5 (2 × CH<sub>3</sub>, t, *J*<sub>C-P</sub> 6); <sup>31</sup>P NMR (162 MHz, CDCl<sub>3</sub>)  $\delta$  27.26; MS CI *m/z* 284 (M + H<sup>+</sup>, 100), 139 (30) and 146 (10); HRMS calcd for C<sub>14</sub>H<sub>23</sub>NO<sub>3</sub><sup>31</sup>P, 284.1410, found 284.1413.

#### Diethyl (2*R*\*,3*R*\*)-3-[4-(*tert*-butyldimethylsilyloxy)butyl]-aziridin-2-ylphosphonate **3e**

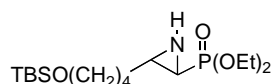

Following **General procedure B** using aziridine **1e** (100 mg, 0.27 mmol, all other reagents were scaled accordingly) for 2 h gave, following purification of the resulting residue by column chromatography (EtOAc/CHCl<sub>3</sub>/MeOH 1:1:0.05) aziridinyolphosphonate **3e** as a pale yellow oil (95 mg, 95%). *R*<sub>f</sub> 0.55 (EtOAc/CHCl<sub>3</sub>/MeOH 1:1:0.05);  $\nu_{\max}/\text{cm}^{-1}$  3249br.m (N–H), 2932m, 1858s, 1648w, 1473m, 1254m (P=O), 1100s (P–O–C), 1029m and 969s; <sup>1</sup>H NMR (400 MHz, CDCl<sub>3</sub>)  $\delta$  4.17–4.10 (4H, m, 2 × OCH<sub>2</sub>), 3.61 (2H, t, *J* 6, OCH<sub>2</sub>), 2.35 (1H, br.s, CHN), 1.56–1.47 (8H, m, 3 × CH<sub>2</sub>, CHP, NH), 1.35 (6H, t, *J* 7, 2 × OCH<sub>2</sub>CH<sub>3</sub>), 0.89 (9H, s, C(CH<sub>3</sub>)<sub>3</sub>) and 0.04 (6H, s, Si(CH<sub>3</sub>)<sub>2</sub>); <sup>13</sup>C NMR (100 MHz, CDCl<sub>3</sub>)  $\delta$  62.9 (2 × POCH<sub>2</sub>, t, *J*<sub>C-P</sub> 7), 62.4 (OCH<sub>2</sub>), 34.7 (CHN), 32.8 (NCHCH<sub>2</sub>), 32.4 (OCH<sub>2</sub>CH<sub>2</sub>), 28.5 (NCHP, d, *J*<sub>C-P</sub> 182), 25.9 (C(CH<sub>3</sub>)<sub>3</sub>), 23.6 (CH<sub>2</sub>), 18.3 (SiC), 16.4 (CH<sub>2</sub>CH<sub>3</sub>, t, *J*<sub>C-P</sub> 6) and –5.3 (Si(CH<sub>3</sub>)<sub>2</sub>); <sup>31</sup>P NMR (162 MHz, CDCl<sub>3</sub>)  $\delta$  26.5; MS CI *m/z* (rel. int.) 366 (M + H<sup>+</sup>, 95), 351 (75), 234 (80) and 228 (100); HRMS calcd for C<sub>16</sub>H<sub>37</sub>NO<sub>4</sub><sup>31</sup>PSi, 366.2230, found 366.2240.

### Diethyl (2*R*\*,3*R*\*)-3-(4-chlorobutyl)aziridin-2-ylphosphonate **3f**

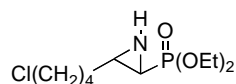

Following **General procedure B** using aziridine **1f** (100 mg, 0.37 mmol, all other reagents were scaled accordingly) for 1 h gave, following purification of the resulting residue by column chromatography (EtOAc/CHCl<sub>3</sub>/MeOH 1:1:0.05), aziridinylphosphonate **3f** as a pale yellow oil (87 mg, 87%). *R*<sub>f</sub> 0.36 (EtOAc/CHCl<sub>3</sub>/MeOH 1:1:0.05);  $\nu_{\max}/\text{cm}^{-1}$  3246br.m (N–H), 2985s, 1445m, 1236s (P=O), 1164m (P–O–C), 1028s and 968s; <sup>1</sup>H NMR (400 MHz, CDCl<sub>3</sub>)  $\delta$  4.18–4.10 (4H, m, 2  $\times$  OCH<sub>2</sub>), 3.55 (2H, t, *J* 7, ClCH<sub>2</sub>), 2.38–2.31 (1H, m, CHN), 1.85–1.80 (2H, m, ClCH<sub>2</sub>CH<sub>2</sub>), 1.67–1.46 (6H, m, 2  $\times$  CH<sub>2</sub>, NH, CHP) and 1.36 (6H, t, *J* 7, CH<sub>3</sub>); <sup>13</sup>C NMR (100 MHz, CDCl<sub>3</sub>)  $\delta$  63.5 (2  $\times$  OCH<sub>2</sub> t, *J*<sub>C-P</sub> 5), 44.8 (ClCH<sub>2</sub>), 34.6 (CHN, d, *J*<sub>C-P</sub> 7), 32.3 (CH<sub>2</sub>CH), 32.1 (ClCH<sub>2</sub>CH<sub>2</sub>), 28.6 (CHP, d, *J*<sub>C-P</sub> 189), 24.6 (CH<sub>2</sub>) and 16.4 (2  $\times$  CH<sub>3</sub>, t, *J*<sub>C-P</sub> 5); <sup>31</sup>P NMR (162 MHz, CDCl<sub>3</sub>)  $\delta$  25.88; MS CI *m/z* 272 (<sup>35</sup>ClM + H<sup>+</sup>, 20) and 270 (<sup>35</sup>ClM + H<sup>+</sup>, 100); HRMS calcd for C<sub>10</sub>H<sub>22</sub>NO<sub>3</sub><sup>35</sup>Cl<sup>31</sup>P, 270.1026, found 270.1013.

### Diethyl 3,3-dimethylaziridin-2-ylphosphonate **3g**

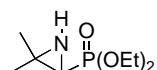

Following **General procedure B** using aziridine **1g** (100 mg, 0.48 mmol, all other reagents were scaled accordingly) for 2 h gave, following purification of the resulting residue by column chromatography (EtOAc/CHCl<sub>3</sub>/MeOH 1:1:0.05), aziridinylphosphonate **3g** as a pale yellow oil (58 mg, 58%). *R*<sub>f</sub> 0.55 (EtOAc/CHCl<sub>3</sub>/MeOH 1:1:0.05);  $\nu_{\max}/\text{cm}^{-1}$  3271br.m (N–H), 2985m, 1650w, 1479m, 1234s (P=O), 1129m (P–O–C), 1025m and 798m; <sup>1</sup>H NMR (400 MHz, CDCl<sub>3</sub>)  $\delta$  4.15–4.10 (4H, m, 2  $\times$  OCH<sub>2</sub>), 1.70 (1H, d, *J* 15, CHP), 1.49 (3H, s, CH<sub>3</sub>), 1.32 (6H, t, *J* 7, 2  $\times$  CH<sub>3</sub>) and 1.26 (3H, s, CH<sub>3</sub>); <sup>13</sup>C NMR (100 MHz, CDCl<sub>3</sub>)  $\delta$  62.2 (POCH<sub>2</sub>, d, *J*<sub>C-P</sub> 6), 62.0 (POCH<sub>2</sub>, d, *J*<sub>C-P</sub> 6), 37.6 (CN), 35.8 (CP, d, *J*<sub>C-P</sub> 191), 26.8 (CH<sub>3</sub>), 20.6 (CH<sub>3</sub>) and 16.3 (2  $\times$  OCH<sub>2</sub>CH<sub>3</sub>); <sup>31</sup>P NMR (162

MHz, CDCl<sub>3</sub>)  $\delta$  25.4; MS CI  $m/z$  208 (M + H<sup>+</sup>, 90), 100 (45), 70 (100) ; HRMS calcd for C<sub>8</sub>H<sub>19</sub>NO<sub>3</sub><sup>31</sup>P, 208.1103, found 208.1099.

### (R)-1-Aminobutan-2-ol **16**

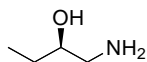

Aq NH<sub>4</sub>OH (6.0 mL, 25% w/v) was added to a stirred solution of (*R*)-1,2-epoxybutane (**15**) (0.86 mL, 10 mmol, Aldrich) in MeCN (2 mL) at room temperature. The colourless solution was heated in a sealed tube at 100 °C for 1 h [9]. Following cooling and evaporation, bulb-to-bulb distillation (9 mbar, 125 °C) gave the  $\beta$ -amino alcohol **16** as a colourless oil (622 mg, 70%).  $[\alpha]_D^{20} = +7.3$  (*c* 1.0, CHCl<sub>3</sub>), lit. [10]  $[\alpha]_D^{25} = +23.82$  (*c* 7.63, MeOH);  $\nu_{\max}/\text{cm}^{-1}$  3353br, m (N–H, O–H), 2928s, 2858m, 1577m, 1467m and 1074w; <sup>1</sup>H NMR (400 MHz, CDCl<sub>3</sub>)  $\delta$  3.46–3.40 (1H, m, OCH), 2.80 (1H, dt, *J* 13, 4, 3, CH(*H*)N), 2.51 (1H, dt, *J* 10, 5, 4 CH(*H*)N), 2.24 (3H, br, NH<sub>2</sub>, OH), 1.47–1.39 (2H, m, CH<sub>2</sub>CH<sub>3</sub>) and 0.94 (3H, t, *J* 8, CH<sub>3</sub>); <sup>13</sup>C NMR (100 MHz, CDCl<sub>3</sub>)  $\delta$  73.4 (CHO), 46.9 (CH<sub>2</sub>N), 27.6 (CH<sub>2</sub>CH<sub>3</sub>) and 10.0 (CH<sub>3</sub>); MS FI  $m/z$  90 (M + H<sup>+</sup>, 100) and 60 (40); HRMS calcd for C<sub>4</sub>H<sub>12</sub>NO, 90.0919, found 90.0917.

### Diethyl (*S*)-2-ethylaziridin-1-ylphosphonate **1k**

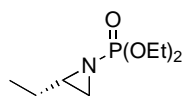

Diethyl chlorophosphate (1.95 mL, 13.5 mmol) was added to a stirred solution of the above prepared  $\beta$ -amino alcohol **16** (600 mg, 6.7 mmol) and Et<sub>3</sub>N (2.81 mL, 20.2 mmol) in THF (60 mL) at room temperature under argon. Following stirring for 20 h, NaH (60% w/w dispersion in mineral oil, 1.62 g, 40.4 mmol) was added and the suspension was stirred for a further 16 h. H<sub>2</sub>O (0.75 mL) was added and the suspension was filtered through a plug of MgSO<sub>4</sub> and washed with Et<sub>2</sub>O (100 mL). Following removal of the solvent under reduced pressure, and column chromatography (EtOAc/CHCl<sub>3</sub> 1:2), aziridine **1k** was obtained as a pale yellow oil (725 mg, 52%).  $[\alpha]_D^{20} = +2.32$

(*c* 1.0, CHCl<sub>3</sub>); *R*<sub>f</sub> 0.55 (EtOAc/CHCl<sub>3</sub> 1:2);  $\nu_{\max}/\text{cm}^{-1}$  2982s, 1466m, 1394m, 1260s (P=O), 1032s and 971s; <sup>1</sup>H NMR (400 MHz, CDCl<sub>3</sub>)  $\delta$  4.16–4.09 (4H, m, 2 × OCH<sub>2</sub>), 2.48–2.38 (1H, m, NCH), 2.29 (1H, dd, *J* 10, 6, CH(*H*)N), 1.88 (1H, dd, *J* 10, 4, CH(*H*)N), 1.57–1.40 (2H, m, CH<sub>2</sub>), 1.31 (6H, t, *J* 7, 2 × OCH<sub>2</sub>CH<sub>3</sub>) and 0.98 (3H, t, *J* 8, CH<sub>3</sub>); <sup>13</sup>C NMR (100 MHz, CDCl<sub>3</sub>)  $\delta$  63.2 (2 × OCH<sub>2</sub>, t, *J*<sub>C-P</sub> 7), 38.1 (CHN, d, *J*<sub>C-P</sub> 6), 30.5 (CH<sub>2</sub>N, d, *J*<sub>C-P</sub> 7), 25.5 (CH<sub>2</sub>, d, *J*<sub>C-P</sub> 5), 16.3 (2 × OCH<sub>2</sub>CH<sub>3</sub>, d, *J*<sub>C-P</sub> 6) and 10.9 (CH<sub>3</sub>); <sup>31</sup>P NMR (162 MHz, CDCl<sub>3</sub>)  $\delta$  15.3; MS CI *m/z* 208 (M + H<sup>+</sup>, 97), 154 (10), 100 (30), 72 (100) and 96 (90); HRMS calcd for C<sub>8</sub>H<sub>19</sub>NO<sub>3</sub><sup>31</sup>P, 208.1103, found 208.1101.

### Diethyl (2*S*,3*S*)-3-ethylaziridin-2-ylphosphonate (–)-**3k**

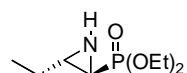

Following **General procedure B** using aziridine **1k** (100 mg, 0.48 mmol, all other reagents were scaled accordingly) for 4 h gave, following purification of the resulting residue by column chromatography (EtOAc/CHCl<sub>3</sub>/MeOH 1:1:0.05), aziridinylphosphonate (–)-**3k** as a pale yellow oil (89 mg, 89%). The enantiomeric excess (>99% ee) was determined by chiral HPLC analysis of the benzoate derivative, see below.  $[\alpha]_{\text{D}}^{20} = -16.5$  (*c* 1.0, CHCl<sub>3</sub>); *R*<sub>f</sub> 0.50 (EtOAc/CHCl<sub>3</sub>/MeOH 1:1:0.05);  $\nu_{\max}/\text{cm}^{-1}$  3289br (N–H), 2985s, 1648m, 1464m, 1394m, 1227s (P=O) and 1026s; <sup>1</sup>H NMR (400 MHz, CDCl<sub>3</sub>)  $\delta$  4.17–4.09 (4H, m, 2 × OCH<sub>2</sub>), 2.32 (1H, br.s, CHN), 1.61–1.42 (4H, m, CHP, NH, CH<sub>2</sub>), 1.34 (6H, t, *J* 7, 2 × OCH<sub>2</sub>CH<sub>3</sub>) and 1.01 (3H, t, *J* 8, CH<sub>3</sub>); <sup>13</sup>C NMR (100 MHz, CDCl<sub>3</sub>)  $\delta$  62.4 (POCH<sub>2</sub>, d, *J*<sub>C-P</sub> 6), 62.3 (POCH<sub>2</sub>, d, *J*<sub>C-P</sub> 6), 36.1 (CHN), 28.2 (PC, d, *J*<sub>C-P</sub> 186), 26.0 (CH<sub>2</sub>), 16.4 (OCH<sub>2</sub>CH<sub>3</sub>, t, *J*<sub>C-P</sub> 5) and 11.1 (CH<sub>3</sub>); <sup>31</sup>P NMR (162 MHz, CDCl<sub>3</sub>)  $\delta$  26.5; MS CI *m/z* 208 (M + H<sup>+</sup>, 80), 98 (30), 72 (40) and 70 (100); HRMS calcd for C<sub>8</sub>H<sub>19</sub>NO<sub>3</sub><sup>31</sup>P, 208.1103, found 208.1103.



## Diethyl (2*S*,3*S*)-1-benzoyl-3-ethylaziridin-2-ylphosphonate (+)-**17**

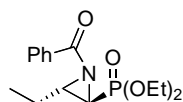

Benzoyl chloride (49 mg, 0.35 mmol) was added to a stirred solution of aziridinylphosphonate (–)-**3k** (60 mg, 0.29 mmol) and Et<sub>3</sub>N (49 μL, 0.35 mmol) in CH<sub>2</sub>Cl<sub>2</sub> (3 mL) at room temperature under argon. Following stirring for 2 h, H<sub>2</sub>O (10 mL) was added and the aqueous phase was washed with CH<sub>2</sub>Cl<sub>2</sub> (3 × 5 mL), the combined organic phase was dried (MgSO<sub>4</sub>) and evaporated under reduced pressure. Purification of the residue by column chromatography (EtOAc/CHCl<sub>3</sub> 1:2) gave diethyl (2*S*,3*S*)-1-benzoyl-3-ethylaziridin-2-ylphosphonate (+)-**17** as a colourless oil (81 mg, 90%).  $[\alpha]_D^{20} = +14.8$  (c 1.0, CHCl<sub>3</sub>); R<sub>f</sub> 0.60 (EtOAc/CHCl<sub>3</sub> 1:2);  $\nu_{\max}/\text{cm}^{-1}$  3289br.m (N–H), 2985s, 1678s (C=O), 1451w, 1254s (P=O), 1025s, 968m and 723m; <sup>1</sup>H NMR (400 MHz, CDCl<sub>3</sub>) δ 8.05–8.03 (2H, m, 2 × C<sub>Ar</sub>H), 7.58–7.54 (1H, m, C<sub>Ar</sub>H), 7.47–7.43 (2H, m, 2 × C<sub>Ar</sub>H), 4.20–4.09 (4H, m, 2 × OCH<sub>2</sub>), 3.16–3.10 (1H, m, NCH), 2.66 (1H, dd, <sup>2</sup>J<sub>H-P</sub> 18, <sup>3</sup>J<sub>H-H</sub> 3.5, CHP), 1.77–1.66 (1H, m, CH<sub>3</sub>CH(H)), 1.35 (3H, t, *J* 7, OCH<sub>2</sub>CH<sub>3</sub>), 1.31 (3H, t, *J* 7, OCH<sub>2</sub>CH<sub>3</sub>), 1.14–1.03 (1H, m, CH<sub>3</sub>CH(H)) and 0.97 (3H, t, *J* 8, CH<sub>3</sub>); <sup>13</sup>C NMR (100 MHz, CDCl<sub>3</sub>) δ 176.3 (C=O), 133.2 (C<sub>Ar</sub> quat), 132.9 (2 × C<sub>Ar</sub>), 129.1 (2 × C<sub>Ar</sub>), 128.4 (C<sub>Ar</sub>), 63.1 (OCH<sub>2</sub>, d, *J*<sub>C-P</sub> 6), 62.5 (OCH<sub>2</sub>, d, *J*<sub>C-P</sub> 6), 44.9 (CHN, d, *J*<sub>C-P</sub> 4), 34.4 (PC, *J*<sub>C-P</sub> 201), 24.3 (CH<sub>2</sub>), 16.4 (OCH<sub>2</sub>CH<sub>3</sub>, t, *J*<sub>C-P</sub> 6) and 11.0 (CH<sub>3</sub>); <sup>31</sup>P NMR (162 MHz, CDCl<sub>3</sub>) δ 20.1; MS CI *m/z* 312 (M + H<sup>+</sup>, 15), 174 (100), 156 (40) and 105 (35); HRMS calcd for C<sub>15</sub>H<sub>23</sub>NO<sub>4</sub><sup>31</sup>P, 312.1365, found 312.1370.

The enantiomeric excess (>99%) was determined by chiral HPLC analysis, Chiralcel OJ-H column (250 × 4.6 mm), 98:2 hexane:*i*-PrOH, 0.25 ml/min. *t*<sub>R</sub> = 76.2 min. Chiral HPLC analysis of racemic diethyl (2*R*\*,3*R*\*)-1-benzoyl-3-ethylaziridin-2-ylphosphonate **17**: Chiralcel OJ-H column, 98:2 hexane:*i*-PrOH, 0.25 ml/min. *t*<sub>R</sub> = 71.8 and 90.1 min.

## Diethyl (*S*)-(2-aminobutyl)phosphonate (+)-**18**

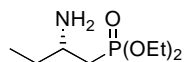

Ammonium formate (304 mg, 4.83 mmol) was added to a stirred suspension of aziridinyphosphonate (–)-**3k** (50 mg, 0.24 mmol) and 10% Pd/C (10 mg, 0.01 mmol) in MeOH (5 mL) at room temperature under argon. Following stirring at reflux for 16 h, the suspension was cooled and NH<sub>4</sub>OH (25% aqueous solution) was added until pH > 8. The aqueous phase was washed with CH<sub>2</sub>Cl<sub>2</sub> (3 × 5 mL), the combined organic phase was dried (MgSO<sub>4</sub>) and evaporated under reduced pressure. Purification by column chromatography (CH<sub>2</sub>Cl<sub>2</sub> to CH<sub>2</sub>Cl<sub>2</sub>/MeOH/NH<sub>4</sub>OH 96:3:1) gave β-amino phosphonate (+)-**18** as a colourless oil (34 mg, 68%). The enantiomeric excess (>99% ee) was determined by chiral HPLC analysis of the benzoate derivative, see below.  $[\alpha]_{\text{D}}^{20} = +16.3$  (*c* 0.58, MeOH), lit. [11]  $[\alpha]_{\text{D}}^{20} = +7.3$  (*c* 2.3, MeOH, 64% ee), lit. (ent.) [12]  $[\alpha]_{\text{D}}^{20} = -3.9$  (*c* 0.71, CH<sub>2</sub>Cl<sub>2</sub>, 24% ee); *R*<sub>f</sub> 0.12 (CH<sub>2</sub>Cl<sub>2</sub>/MeOH/NH<sub>4</sub>OH 96:3:1); IR (neat) 3423br.m (N–H), 1643m, 1209w (P=O) and 1025m cm<sup>-1</sup>; <sup>1</sup>H NMR (250 MHz, CD<sub>3</sub>OD) δ 4.20–4.09 (4H, m, 2 × OCH<sub>2</sub>), 3.14–3.04 (1H, m, CHN), 2.09–1.99 (1H, m, CH(*H*)P), 1.88–1.80 (1H, m, CH(*H*)P), 1.63–1.45 (2H, m, CH<sub>2</sub>), 1.35 (6H, t, *J* 7, 2 × OCH<sub>2</sub>CH<sub>3</sub>), 0.97 (3H, t, *J* 8, CH<sub>3</sub>); <sup>13</sup>C NMR (100 MHz, CD<sub>3</sub>OD) δ 63.6 (POCH<sub>2</sub>, d, *J*<sub>C-P</sub> 6), 48.7 (CHN, d, *J*<sub>C-P</sub> 4), 33.6 (PCH<sub>2</sub>, d, *J*<sub>C-P</sub> 138), 31.7 (CH<sub>2</sub>, d, *J*<sub>C-P</sub> 14), 16.9 (2 × OCH<sub>2</sub>CH<sub>3</sub>, d, *J*<sub>C-P</sub> 6), 10.5 (CH<sub>3</sub>); <sup>31</sup>P NMR (162 MHz, CD<sub>3</sub>OD) δ 31.4; MS CI *m/z* 210 (M + H<sup>+</sup>, 100), 193 (30), 153 (35); HRMS calcd for C<sub>8</sub>H<sub>21</sub>NO<sub>3</sub><sup>31</sup>P, 210.1259, found 210.1256.

## Diethyl (*S*)-2-benzamidobutylphosphonate (–)-**19**

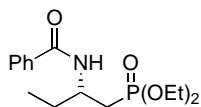

Benzoyl chloride (32 mg, 0.23 mmol) was added to a stirred solution of  $\beta$ -amino phosphonate (+)-**18** (40 mg, 0.19 mmol) and Et<sub>3</sub>N (32  $\mu$ L, 0.23 mmol) in CH<sub>2</sub>Cl<sub>2</sub> (3 mL) at room temperature under argon. Following stirring for 2 h, H<sub>2</sub>O (10 mL) was added, the aqueous phase was washed with CH<sub>2</sub>Cl<sub>2</sub> (3  $\times$  5 mL), the combined organic phase was dried (MgSO<sub>4</sub>) and evaporated under reduced pressure. Purification by column chromatography (EtOAc/CHCl<sub>3</sub> 1:2) gave diethyl (*S*)-2-benzamidobutylphosphonate (–)-**19** as a colourless oil (54 mg, 91%).  $[\alpha]_D^{20} = -28.6$  ( $c$  0.3, CHCl<sub>3</sub>);  $R_f$  0.36 (EtOAc/CHCl<sub>3</sub> 1:2); IR (neat) 3304br.m (N–H), 2934s, 1713s (C=O), 1579s, 1226s (P=O), 1053s, 959s and 712m cm<sup>-1</sup>; <sup>1</sup>H NMR (400 MHz, CDCl<sub>3</sub>)  $\delta$  7.87–7.84 (2H, m, 2  $\times$  C<sub>Ar</sub>H), 7.49–7.38 (3H, m, 3  $\times$  C<sub>Ar</sub>H), 4.48–4.32 (1H, m, NCH), 4.20–4.03 (4H, m, 2  $\times$  OCH<sub>2</sub>), 2.17–2.11 (2H, m, PCH<sub>2</sub>), 1.89–1.70 (2H, m, CH<sub>2</sub>), 1.34 (3H, t,  $J$  7, OCH<sub>2</sub>CH<sub>3</sub>), 1.28 (3H, t,  $J$  7, OCH<sub>2</sub>CH<sub>3</sub>), 0.98 (3H, t,  $J$  8, CH<sub>3</sub>); <sup>13</sup>C NMR (100 MHz, CDCl<sub>3</sub>)  $\delta$  166.7 (C=O), 134.5 (C<sub>Ar</sub> quat), 131.3 (2  $\times$  C<sub>Ar</sub>), 128.5 (2  $\times$  C<sub>Ar</sub>), 127.0 (C<sub>Ar</sub>), 62.1 (OCH<sub>2</sub>,  $J_{C-P}$  6), 61.5 (OCH<sub>2</sub>,  $J_{C-P}$  6), 46.9 (CHN,  $J_{C-P}$  6), 29.2 (CHP,  $J_{C-P}$  139), 28.3 (CH<sub>2</sub>,  $J_{C-P}$  5), 16.4 (2  $\times$  OCH<sub>2</sub>CH<sub>3</sub>, t,  $J_{C-P}$  6), 10.7 (CH<sub>3</sub>); <sup>31</sup>P NMR (162 MHz, CDCl<sub>3</sub>)  $\delta$  30.3; MS CI  $m/z$  314 (M + H<sup>+</sup>, 100), 193 (20), 131 (20), 122 (25), 103 (15), 87 (10); HRMS calcd for C<sub>15</sub>H<sub>25</sub>NO<sub>4</sub><sup>31</sup>P, 314.1521, found 314.1529.

The enantiomeric excess (>99%) was determined by chiral HPLC analysis, Chiralcel OJ-H column, 98:2 hexane:*i*-PrOH, 0.25 ml/min.  $t_R = 156.2$  min. Chiral HPLC analysis of racemic diethyl 2-benzamidobutylphosphonate **19**: Chiralcel OD-H column, 98:2 hexane:*i*-PrOH, 0.25 ml/min.  $t_R = 155.4$  and 181.7 min.

## References

1. Pangborn, A. B.; Giardello, M. A.; Grubbs, R. H.; Rosen, R. K.; Timmers, F. J. *Organometallics* **1996**, *15*, 1518–1520. doi:[10.1021/om9503712](https://doi.org/10.1021/om9503712)
2. Gottlieb, H. E.; Kotlyar, V.; Nudelman, A. *J. Org. Chem.* **1997**, *62*, 7512–7515. doi:[10.1021/jo971176v](https://doi.org/10.1021/jo971176v)
3. Zwierzak, A.; Zawadzki, S. *Synthesis* **1972**, 416–417. doi:[10.1055/s-1972-21890](https://doi.org/10.1055/s-1972-21890)
4. Zawadzki, S.; Zwierzak, A. *Tetrahedron* **1973**, *29*, 315–320. doi:[10.1016/S0040-4020\(01\)93296-X](https://doi.org/10.1016/S0040-4020(01)93296-X)
5. Osowska-Pacewicka, K.; Zwierzak, A. *J. Prakt. Chem.* **1986**, *328*, 441–444. doi:[10.1002/prac.19863280321](https://doi.org/10.1002/prac.19863280321)
6. Brosius, A. D.; Overman, L. E.; Schwink, L. *J. Am. Chem. Soc.* **1999**, *121*, 700–709. doi:[10.1021/ja983013+](https://doi.org/10.1021/ja983013+)
7. Osowska-Pacewicka, K.; Zwierzak, A. *Synthesis* **1996**, 333–335. doi:[10.1055/s-1996-4213](https://doi.org/10.1055/s-1996-4213)
8. Gajda, T.; Napieraj, A.; Osowska-Pacewicka, K.; Zawadzki, S.; Zwierzak, A. *Tetrahedron* **1997**, *53*, 4935–4946. doi:[10.1016/S0040-4020\(97\)00188-9](https://doi.org/10.1016/S0040-4020(97)00188-9)
9. Hodgson, D. M.; Humphreys, P. G.; Miles, S. M.; Brierley, C. A. J.; Ward, J. G. *J. Org. Chem.* **2007**, *72*, 10009–10021. doi:[10.1021/jo701901t](https://doi.org/10.1021/jo701901t)
10. Wenghoefer, H. M.; Lee, K. T.; Srivastava, R. M.; Srimannarayana, G.; Clapp, L. B. *J. Heterocycl. Chem.* **1970**, *7*, 1407–1411. doi:[10.1002/jhet.5570070631](https://doi.org/10.1002/jhet.5570070631)
11. Yuan, C.; Xu, C.; Zhang, Y. *Tetrahedron* **2003**, *59*, 6095–6102. doi:[10.1016/S0040-4020\(03\)00995-5](https://doi.org/10.1016/S0040-4020(03)00995-5)
12. Palacios, F.; Aparicio, D.; Ochoa de Retana, A. M.; de los Santos, J. M.; Gil, J. I.; López de Munain, R. *Tetrahedron: Asymmetry* **2003**, *14*, 689–700. doi:[10.1016/S0957-4166\(03\)00089-2](https://doi.org/10.1016/S0957-4166(03)00089-2)
